# Supplementary material for: Heterosubtypic neutralizing antibodies are produced by individuals immunized with a seasonal influenza vaccine
Source: JCI journal article supplement (doi:10.1172/jci41902), 2010-04-13
Supplement: sd1 [file 1]

## SUPPLEMENTARY MATERIAL

**Supplementary Figure 1. H5 neutralizing activity is associated with the plasma IgG fraction.** The plasma IgG fraction from 3 donors (B, D and N) was isolated using protein G beads. Purified IgG and depleted plasma (FT) were tested in a pseudotyped neutralization assay against the H5 A/VN/1194/04 isolate.

**Supplementary Table 1. Frequency of vaccine-binding and H5-pseudovirus neutralizing B cells in three donors immunized with seasonal influenza vaccine.**

| Donor code | IgG specific memory B cells (x 10 <sup>6</sup> cells) |        |                      |       |
|------------|-------------------------------------------------------|--------|----------------------|-------|
|            | Vaccine specific (ELISA)                              |        | H5-pp neutralization |       |
|            | Pre                                                   | Post   | Pre                  | Post  |
| B          | 3000                                                  | 60000  | -                    | 1480  |
| C          | 3000                                                  | 420000 | -                    | 16680 |
| M          | 15000                                                 | 72000  | -                    | 320   |

PBMC collected before and two weeks after vaccination were polyclonally stimulated with R848 and IL-2 and the 14 day culture supernatants were tested for their capacity to bind the vaccine (ELISA) or to neutralize H5 pseudotypes. Shown is the frequency of antigen-specific B cells producing vaccine-binding and H5-neutralizing antibodies. -, not detectable

**Supplementary Table 2. Hemagglutination inhibition (HAI) titers of human mAbs.**

| Virus                       | MAbs    |                |         |         |         |
|-----------------------------|---------|----------------|---------|---------|---------|
|                             | FE17.23 | FE43.4         | FB110.1 | FC41.25 | Ctr mAb |
| A/VietNam/1203/2004 (H5N1)  | ≥1280*  | 5 <sup>†</sup> | 80      | 5       | 5       |
| A/swine/Iowa/31 (H1N1)      | ≥ 1280  | 20             | 160     | 10      | 5       |
| A/PR/8/34 (H1N1)            | ≥ 1280  | 5              | 320     | 5       | 5       |
| A/New Jersey/76 (H1N1)      | 5       | 5              | 160     | 5       | 5       |
| A/California/07/2009 (H1N1) | 5       | 5              | 320     | 20      | 5       |

MAbs were tested in a HAI assay against a panel of H1N1 and H5N1 viruses. HAI titers are presented as the reciprocal of the highest dilution of antibody at which inhibition of hemagglutination was observed. Undiluted antibody concentration was 1 mg/ml. All mAbs tested are of the IgG1 isotype, except FB110 which is IgG3. \*Highest dilution tested = 1280. <sup>†</sup>An undetectable titer was assigned a value of 5.

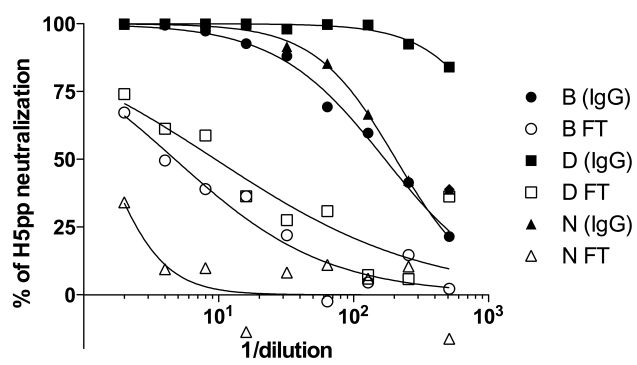

Suppl. Figure 1
